# Supplementary material for: Adjuvant Injections Altered the Ileal and Fecal Microbiota Differently with Changes in Immunoglobulin Isotypes and Antimycobacterial Antibody Responses
Source: Int J Mol Sci. 2023 Feb 1;24(3):2818. doi: 10.3390/ijms24032818 (PMC9917480; doi:10.3390/ijms24032818)
Supplement: Supplementary file 1 [file ijms-24-02818-s001.zip › Supplemental Tables S3 Khadka et al IJMS 2023.xlsx]

## Sheet: Sheet 1 Phylum (%)
Sample	Ileum	Ileum	Ileum	Ileum	Ileum	Ileum	Ileum	Ileum	Ileum	Ileum	Ileum	Ileum	Ileum	Ileum	Ileum	Ileum	Ileum	Feces	Feces	Feces	Feces	Feces	Feces	Feces	Feces	Feces	Feces	Feces	Feces	Feces	Feces	Feces
Group	Naïve 1	Naïve 2	Naïve 3	Naïve 4	Naïve 5	Naïve 6	Naïve 7	Naïve 8	CFA 1	CFA 2	CFA 3	CFA 4	CFA 5	CFA 6	CFA 7	CFA 8	Naïve 1	Naïve 2	Naïve 3	Naïve 4	Naïve 5	Naïve 6	Naïve 7	Naïve 8	CFA 1	CFA 2	CFA 3	CFA 4	CFA 5	CFA 6	CFA 7	CFA 8
Phylum / Sample IDs	il.290	il.291	il.292	il.293	il.294	il.295	il.296	il.297	il.298	il.299	il.300	il.301	il.302	il.303	il.305	il.306	st.290	st.291	st.292	st.293	st.294	st.295	st.296	st.297	st.298	st.299	st.300	st.301	st.302	st.303	st.305	st.306
D_0__Bacteria;D_1__Bacteroidetes	74.0935	70.9643	77.0245	69.9597	71.2141	53.1935	81.9235	79.8905	84.8288	83.0115	70.6897	81.2993	75.0478	61.7373	70.3138	74.7698	56.7852	51.899	49.5202	48.569	66.293	51.7816	76.9877	55.0509	66.0117	72.0894	74.4258	64.207	67.2382	66.6895	71.9269	71.5246
D_0__Bacteria;D_1__Firmicutes	19.3265	27.3028	17.3051	19.471	24.8013	44.8665	16.2888	15.6977	8.75414	15.0419	28.1922	14.8824	21.0315	36.7338	20.6081	17.2607	41.2664	43.6044	42.3688	49.2302	28.4094	46.1728	20.6444	37.3187	31.3956	23.0188	20.9559	33.4514	23.0416	25.8723	20.7192	26.2851
D_0__Bacteria;D_1__Tenericutes	0.272858	0.0943794	0.401707	0.846696	0.116342	0.137582	0.0460197	0.00370842	0.115994	0.00192359	0.0955465	0.153405	0.122012	0.219071	1.84419	0.0800649	0.534314	0.983582	0.0120802	0.609368	2.48033	0.702625	0.0212664	2.43715	0.469069	0.673079	0.281236	0.252772	0.652481	0.397541	0.732956	0.269466
D_0__Bacteria;D_1__Proteobacteria	4.91605	1.25404	4.841	4.31022	2.32449	1.10712	1.39263	3.76899	5.35807	1.84152	0.89483	3.51151	3.57538	1.0408	3.03438	7.36171	1.18425	1.80987	0.903194	0.595914	2.47564	1.06204	2.17326	3.20947	1.62221	3.64431	3.70689	1.58025	2.5135	5.39005	5.32638	1.57125
D_0__Bacteria;D_1__Cyanobacteria	0.115923	0.286652	0.0713493	0.637673	0.222871	0.203603	0.316474	0.161316	0.17217	0.0801498	0.0790096	0.10227	0.171034	0.175199	0.229041	0.0773126	0.166614	0.196446	0.487636	0.185184	0.0842573	0.106811	0.108786	0.123757	0.229294	0.030941	0.161372	0.477171	0.313154	0.401017	0.663095	0.264153
D_0__Bacteria;D_1__Chlamydiae	0	0	0	0	0	0	0	0	0	0	0	0	0	0	0	0.00100081	0	0	0	0	0	0	0	0	0	0	0	0	0	0	0	0
D_0__Bacteria;D_1__Fusobacteria	0	0	0	0	0	0	0	0	0	0	0	0	0	0	0	0.00250203	0	0	0	0	0	0	0	0	0	0	0	0	0	0	0	0
D_0__Bacteria;D_1__Nitrospirae	0	0	0	0	0	0.00230842	0	0	0	0	0	0	0	0	0	0	0	0	0	0	0	0	0	0	0	0	0	0	0	0	0	0
D_0__Bacteria;D_1__Spirochaetes	0	0	0	0	0	0	0	0	0	0	0	0	0	0	0	0	0	0	0	0	0	0	0	0	0	0	0.00296483	0	0	0	0	0
D_0__Bacteria;__	0.00460343	0.00100404	0	0.0040391	0.00233618	0	0	0.00741684	0	0	0	0	0.000817042	0	0	0	0.00430898	0.00270029	0.00362405	0.00118708	0	0.00202486	0.00245382	0.00102703	0.00190549	0	0.000847095	0.00472872	0	0	0.00115791	0.00417483
D_0__Bacteria;D_1__Patescibacteria	0.0104624	0.00853431	0.0156382	0.0040391	0.0144843	0.0604807	0.0113279	0.00494456	0.126397	0	0.0151588	0.00700481	0.0182473	0.057149	0.0187648	0.29649	0.0143633	0.128939	0.0197309	0.0391736	0.0567567	0.0263231	0.0102242	0.110919	0.23247	0.0439452	0.0436254	0.00730802	0.0890791	0.0729911	0.0362811	0.0110064
D_0__Bacteria;D_1__Verrucomicrobia	1.21656	0.0391574	0.305434	4.70504	1.2877	0.420595	0.0113279	0.0123614	0.58673	0.00961797	0.012862	0.0140096	0.0130727	0.0314608	3.93564	0.0235191	0.0143633	1.30087	6.66503	0.752213	0.0550013	0.106305	0.0143139	1.72233	0.0158791	0.408959	0.363404	0.0150459	6.14003	1.14049	0.539199	0.0504774
D_0__Bacteria;D_1__Actinobacteria	0.0435234	0.0491978	0.035186	0.0615963	0.0163532	0.00831033	0.00991193	0.453045	0.0577367	0.0134652	0.0206711	0.0301207	0.0201537	0.00519536	0.0160053	0.126853	0.0301629	0.0742581	0.0197309	0.0178062	0.145695	0.0394847	0.0376252	0.0256758	0.0219132	0.0905809	0.058026	0.00429884	0.0119384	0.0360611	0.0548076	0.0197355

## Sheet: Sheet 2 Genus (%)  
Sample	Ileum	Ileum	Ileum	Ileum	Ileum	Ileum	Ileum	Ileum	Ileum	Ileum	Ileum	Ileum	Ileum	Ileum	Ileum	Ileum	Ileum	Feces	Feces	Feces	Feces	Feces	Feces	Feces	Feces	Feces	Feces	Feces	Feces	Feces	Feces	Feces
Group	Naïve 1	Naïve 2	Naïve 3	Naïve 4	Naïve 5	Naïve 6	Naïve 7	Naïve 8	CFA 1	CFA 2	CFA 3	CFA 4	CFA 5	CFA 6	CFA 7	CFA 8	Naïve 1	Naïve 2	Naïve 3	Naïve 4	Naïve 5	Naïve 6	Naïve 7	Naïve 8	CFA 1	CFA 2	CFA 3	CFA 4	CFA 5	CFA 6	CFA 7	CFA 8
Genus / Sample IDs	il.290	il.291	il.292	il.293	il.294	il.295	il.296	il.297	il.298	il.299	il.300	il.301	il.302	il.303	il.305	il.306	st.290	st.291	st.292	st.293	st.294	st.295	st.296	st.297	st.298	st.299	st.300	st.301	st.302	st.303	st.305	st.306
D_0__Bacteria;__;__;__;__;__	0.00460343	0.00100404	0	0.0040391	0.00233618	0	0	0.00741684	0	0	0	0	0.000817042	0	0	0	0.00430898	0.00270029	0.00362405	0.00118708	0	0.00202486	0.00245382	0.00102703	0.00190549	0	0.000847095	0.00472872	0	0	0.00115791	0.00417483
D_0__Bacteria;D_1__Actinobacteria;D_2__Actinobacteria;D_3__Bifidobacteriales;D_4__Bifidobacteriaceae;D_5__Bifidobacterium	0.0297131	0.0441776	0.0219912	0.0525083	0.0163532	0.00230842	0.00991193	0	0.020806	0	0	0.0147101	0.00735338	0.00173179	0.00358738	0.0845685	0.0122088	0.0499554	0.00604008	0.00830956	0.0877681	0.0192361	0.00286279	0.00872977	0.00349341	0.0219726	0.0406606	0.00214942	0.00964258	0.023027	0.0467023	0.012904
D_0__Bacteria;D_1__Actinobacteria;D_2__Actinobacteria;D_3__Corynebacteriales;D_4__Corynebacteriaceae;D_5__Corynebacterium	0	0	0	0	0	0	0	0	0	0	0	0	0	0	0.00165572	0	0	0	0	0	0	0	0	0	0	0	0	0	0	0	0	0
D_0__Bacteria;D_1__Actinobacteria;D_2__Actinobacteria;D_3__Corynebacteriales;D_4__Corynebacteriaceae;D_5__Corynebacterium 1	0	0	0	0	0	0	0	0.447483	0.017165	0.00577078	0.011484	0.0105072	0.00599164	0.00115452	0	0	0	0	0	0	0	0	0.000817939	0	0	0	0	0	0	0	0	0
D_0__Bacteria;D_1__Actinobacteria;D_2__Actinobacteria;D_3__Micrococcales;D_4__Microbacteriaceae;__	0	0	0	0	0	0	0	0	0	0	0	0	0	0	0	0	0	0	0	0	0	0	0	0	0	0	0	0	0	0	0	0.00151812
D_0__Bacteria;D_1__Actinobacteria;D_2__Actinobacteria;D_3__Micrococcales;D_4__Micrococcaceae;D_5__Kocuria	0	0	0	0	0	0	0	0	0	0	0	0	0	0	0	0.00125101	0	0	0	0	0	0	0	0	0	0	0	0	0	0	0	0
D_0__Bacteria;D_1__Actinobacteria;D_2__Actinobacteria;D_3__Micrococcales;D_4__Micrococcaceae;D_5__Micrococcus	0	0	0	0	0	0	0	0	0	0	0	0	0	0	0	0	0	0	0	0	0	0	0	0	0.000952747	0	0	0	0	0	0	0
D_0__Bacteria;D_1__Actinobacteria;D_2__Actinobacteria;D_3__Micrococcales;D_4__Micrococcaceae;D_5__Paenarthrobacter	0	0	0	0	0	0	0	0	0	0	0	0	0	0	0	0	0	0	0	0	0	0	0	0	0	0	0.00338838	0	0	0	0	0
D_0__Bacteria;D_1__Actinobacteria;D_2__Coriobacteriia;D_3__Coriobacteriales;D_4__Atopobiaceae;D_5__Coriobacteriaceae UCG-002	0.00669591	0.00150605	0.00439825	0.00353421	0	0	0	0	0.00624181	0	0	0.00350241	0.00381286	0	0.00220762	0	0	0	0	0	0.0175536	0.00556835	0	0	0	0.0331831	0.0080474	0	0	0.0030413	0.00154388	0
D_0__Bacteria;D_1__Actinobacteria;D_2__Coriobacteriia;D_3__Coriobacteriales;D_4__Eggerthellaceae;__	0	0.00100404	0	0	0	0.00092337	0	0	0	0	0	0	0	0	0	0.00475385	0	0	0	0	0.00234048	0	0	0.00308109	0.000635165	0.00313894	0	0	0	0	0	0
D_0__Bacteria;D_1__Actinobacteria;D_2__Coriobacteriia;D_3__Coriobacteriales;D_4__Eggerthellaceae;D_5__DNF00809	0	0	0	0	0	0	0	0	0	0	0	0	0.00108939	0	0	0	0	0	0	0.00237416	0.00760657	0	0	0	0	0.00179368	0	0	0	0	0	0
D_0__Bacteria;D_1__Actinobacteria;D_2__Coriobacteriia;D_3__Coriobacteriales;D_4__Eggerthellaceae;D_5__Enterorhabdus	0.00544042	0.00251009	0.00439825	0.00555376	0	0.00507853	0	0.00556263	0.00832241	0.00769438	0.00918717	0.00140096	0	0.00230905	0.00634691	0.0277725	0.00502715	0.0128264	0.0072481	0.00276985	0.00994705	0.00455592	0.0175857	0	0.0088923	0.0183852	0	0.00214942	0	0.00738601	0.00424566	0.00417483
D_0__Bacteria;D_1__Actinobacteria;D_2__Coriobacteriia;D_3__Coriobacteriales;D_4__Eggerthellaceae;D_5__Gordonibacter	0.00167398	0	0.00146608	0	0	0	0	0	0.00520151	0	0	0	0.00190643	0	0.00137976	0.00850689	0.0129269	0.0114763	0.00644275	0.00435263	0.0152131	0.0101243	0.0147229	0.0138649	0.00793956	0.0121074	0.00381193	0	0.00229585	0.00260683	0.00231582	0.00113859
D_0__Bacteria;D_1__Actinobacteria;D_2__Coriobacteriia;D_3__Coriobacteriales;D_4__Eggerthellaceae;D_5__uncultured	0	0	0.00293216	0	0	0	0	0	0	0	0	0	0	0	0.000827858	0	0	0	0	0	0.00526608	0	0.00163588	0	0	0	0.00211774	0	0	0	0	0
D_0__Bacteria;D_1__Bacteroidetes;D_2__Bacteroidia;D_3__Bacteroidales;__;__	0	0.0055222	0.00928519	0	0.00093447	0.00138505	0.00141599	0	0	0	0.000918717	0	0	0	0	0	0	0	0.00201336	0.00237416	0	0	0	0	0	0	0.00677676	0	0	0	0	0
D_0__Bacteria;D_1__Bacteroidetes;D_2__Bacteroidia;D_3__Bacteroidales;D_4__Bacteroidaceae;D_5__Bacteroides	2.73026	4.60652	3.75513	4.38141	2.57633	2.6967	3.84724	7.4224	2.81245	8.02331	4.57383	5.16815	3.22187	3.52534	3.36911	0.0838179	4.25081	1.78084	9.0122	3.4089	2.38378	4.10388	6.15049	6.08362	6.16904	2.03807	2.4481	3.51688	3.87448	2.25881	1.93988	4.84621
D_0__Bacteria;D_1__Bacteroidetes;D_2__Bacteroidia;D_3__Bacteroidales;D_4__Marinifilaceae;D_5__Odoribacter	0.414728	0.458845	0.0933406	0.115619	0.26539	0.0710995	0.152219	0.486421	0.319893	0.130163	0.734055	0.0434298	0.133178	0.369448	0.110657	0.019766	0.309529	0.434072	0.172746	0.248495	0.325912	0.371561	0.276463	0.204379	0.615157	0.214345	0.120711	0.163356	0.0932116	0.089501	0.184107	0.397368
D_0__Bacteria;D_1__Bacteroidetes;D_2__Bacteroidia;D_3__Bacteroidales;D_4__Muribaculaceae;__	19.6337	11.7678	22.6989	15.8514	12.6009	9.64737	16.6931	28.4584	17.7512	16.6301	12.5933	14.6408	15.3274	10.4571	18.6649	29.8724	12.2102	14.72	6.1025	7.95977	18.7543	10.6755	20.8464	12.1031	17.5032	21.3246	19.6416	10.3069	13.5919	13.0854	13.4877	12.436
D_0__Bacteria;D_1__Bacteroidetes;D_2__Bacteroidia;D_3__Bacteroidales;D_4__Muribaculaceae;D_5__Muribaculum	2.13809	1.03566	2.11116	1.44499	1.40871	0.707301	1.6029	1.12241	2.24289	1.19199	0.634374	1.76381	1.80512	0.74842	1.42999	4.97453	1.61515	1.91383	0.734474	0.88477	1.91451	1.19973	1.72626	1.72079	1.29478	2.22058	1.83777	0.929839	1.85367	1.69444	1.32156	1.37352
D_0__Bacteria;D_1__Bacteroidetes;D_2__Bacteroidia;D_3__Bacteroidales;D_4__Muribaculaceae;D_5__uncultured bacterium	8.08112	5.42531	7.8494	7.31885	7.15851	4.71057	9.21526	9.65487	10.5897	7.45393	5.35795	8.23416	7.5669	4.03016	6.08282	16.3442	7.37554	5.21899	5.26494	4.96199	7.72593	5.71212	11.4569	5.0114	7.04461	10.4836	7.75007	6.09403	5.14271	5.38918	6.42523	5.07014
D_0__Bacteria;D_1__Bacteroidetes;D_2__Bacteroidia;D_3__Bacteroidales;D_4__Muribaculaceae;D_5__uncultured Bacteroidales bacterium	21.519	15.1303	16.9538	9.78926	14.5656	4.99589	17.3607	18.2875	30.9692	11.044	15.2291	21.0032	21.3973	11.1155	21.2205	22.832	7.02077	8.69157	5.09058	4.74911	20.2317	10.0564	17.8384	5.40116	9.76661	18.626	13.4722	7.94898	7.48999	11.4296	15.0509	14.2472
D_0__Bacteria;D_1__Bacteroidetes;D_2__Bacteroidia;D_3__Bacteroidales;D_4__Prevotellaceae;__	0	0	0	0	0	0	0	0	0	0.00705318	0	0	0	0	0	0	0	0	0	0	0	0	0	0	0	0	0	0	0	0	0	0
D_0__Bacteria;D_1__Bacteroidetes;D_2__Bacteroidia;D_3__Bacteroidales;D_4__Prevotellaceae;D_5__Alloprevotella	6.07026	4.14115	8.30584	7.97167	9.67644	5.79184	10.0769	0.254027	3.91934	4.88657	2.67117	10.1486	3.89457	5.66987	6.34939	0.0858195	7.09618	2.34926	3.0736	6.03076	4.72836	7.2996	3.09508	5.76267	2.41617	4.25103	8.22614	8.27526	6.21533	10.2309	9.83565	9.00586
D_0__Bacteria;D_1__Bacteroidetes;D_2__Bacteroidia;D_3__Bacteroidales;D_4__Prevotellaceae;D_5__Prevotellaceae UCG-001	0.0410124	0.186249	0.0723267	0.278698	0.100923	0.193446	0.135227	0.118669	0.0572166	0.160941	0.0946278	0.184227	0.233674	0.191362	0.21	0.00250203	0.127833	0.0614317	0.108319	0.0846784	0.0895234	0.073401	0.102242	0.211568	0.235328	0.0358736	0.0681912	0.199896	0.168056	0.0938457	0.217301	0.133594
D_0__Bacteria;D_1__Bacteroidetes;D_2__Bacteroidia;D_3__Bacteroidales;D_4__Rikenellaceae;D_5__Alistipes	13.1817	27.8434	14.8563	22.155	22.5647	23.9365	22.0654	13.2088	15.553	33.0198	28.1288	19.6737	21.0124	25.1268	12.5989	0.492149	16.3253	16.2051	19.1096	19.6561	9.77736	11.8302	14.8885	17.9304	20.4167	12.5809	20.6255	26.2582	27.9167	22.1936	23.233	23.669
D_0__Bacteria;D_1__Bacteroidetes;D_2__Bacteroidia;D_3__Bacteroidales;D_4__Rikenellaceae;D_5__Rikenella	0.255281	0.303721	0.190102	0.339789	0.229412	0.376273	0.535952	0.343647	0.569045	0.142346	0.529181	0.273188	0.329268	0.458058	0.145427	0.054294	0.229812	0.413145	0.341869	0.461378	0.321816	0.356374	0.287097	0.186406	0.290905	0.213897	0.124523	0.316824	0.266778	0.194209	0.166353	0.245935
D_0__Bacteria;D_1__Bacteroidetes;D_2__Bacteroidia;D_3__Bacteroidales;D_4__Tannerellaceae;D_5__Parabacteroides	0.0284576	0.0597402	0.129015	0.31303	0.0663474	0.0650976	0.237178	0.533394	0.044733	0.32124	0.142401	0.166014	0.126097	0.0453151	0.13025	0.00825669	0.224067	0.110712	0.507367	0.120686	0.0397882	0.102761	0.319814	0.435461	0.258194	0.100446	0.103346	0.190439	0.62539	0.0299785	0.0652288	0.0998163
D_0__Bacteria;D_1__Bacteroidetes;D_2__Bacteroidia;D_3__Chitinophagales;D_4__Saprospiraceae;__	0	0	0	0	0	0	0	0	0	0	0	0	0	0	0	0	0	0	0	0	0	0	0	0	0.000952747	0	0	0	0	0	0	0
D_0__Bacteria;D_1__Bacteroidetes;D_2__Bacteroidia;D_3__Chitinophagales;D_4__uncultured;D_5__uncultured Sphingobacteriales bacterium	0	0	0	0	0	0	0	0	0	0	0	0	0	0	0	0	0	0	0	0	0	0	0	0	0	0	0.000847095	0	0	0	0	0
D_0__Bacteria;D_1__Bacteroidetes;D_2__Bacteroidia;D_3__Flavobacteriales;D_4__Weeksellaceae;D_5__Cloacibacterium	0	0	0	0	0	0	0	0	0	0	0	0	0	0	0.00193167	0	0	0	0	0	0	0	0	0	0	0	0	0.00644826	0	0	0	0
D_0__Bacteria;D_1__Chlamydiae;D_2__Chlamydiae;D_3__Chlamydiales;__;__	0	0	0	0	0	0	0	0	0	0	0	0	0	0	0	0.00100081	0	0	0	0	0	0	0	0	0	0	0	0	0	0	0	0
D_0__Bacteria;D_1__Cyanobacteria;D_2__Melainabacteria;D_3__Gastranaerophilales;__;__	0.111738	0.286652	0.0684172	0.630604	0.222871	0.197601	0.309394	0.153899	0.166448	0.0666846	0.0757941	0.0980674	0.166404	0.173179	0.224074	0.053043	0.154405	0.184295	0.476764	0.170544	0.0772359	0.106811	0.0997886	0.119136	0.218497	0.030941	0.155865	0.469433	0.310858	0.397541	0.660393	0.254285
D_0__Bacteria;D_1__Cyanobacteria;D_2__Oxyphotobacteria;D_3__Chloroplast;__;__	0.00418494	0	0.00293216	0.00706842	0	0.0060019	0.00707995	0.00741684	0.00572166	0.0134652	0.00321551	0.00420289	0.00462991	0.00202042	0.00496715	0.0242697	0.0122088	0.0121513	0.0108721	0.0146407	0.00702144	0	0.00899733	0.00462164	0.0107978	0	0.00381193	0.00773791	0.00229585	0.00347577	0.00270178	0.00986777
D_0__Bacteria;D_1__Cyanobacteria;D_2__Oxyphotobacteria;D_3__Chloroplast;D_4__Karenia brevis;D_5__Karenia brevis	0	0	0	0	0	0	0	0	0	0	0	0	0	0	0	0	0	0	0	0	0	0	0	0	0	0	0.00169419	0	0	0	0	0
D_0__Bacteria;D_1__Firmicutes;__;__;__;__	0.00125548	0	0	0.00302932	0	0	0	0	0	0	0	0	0.00163408	0	0.00110381	0.00425345	0.00430898	0	0	0	0.0058512	0	0	0	0.000952747	0	0	0	0	0	0.00115791	0
D_0__Bacteria;D_1__Firmicutes;D_2__Bacilli;D_3__Bacillales;__;__	0	0	0	0	0	0	0	0	0	0	0.000918717	0	0	0	0	0	0.00143633	0	0	0	0	0	0	0	0	0	0	0	0	0	0	0
D_0__Bacteria;D_1__Firmicutes;D_2__Bacilli;D_3__Bacillales;D_4__Alicyclobacillaceae;D_5__Alicyclobacillus	0	0	0	0	0	0	0	0	0	0	0	0	0	0	0	0	0	0	0	0	0	0	0	0	0	0	0	0.00128965	0	0	0	0
D_0__Bacteria;D_1__Firmicutes;D_2__Bacilli;D_3__Bacillales;D_4__Bacillaceae;__	0	0	0	0	0	0	0	0	0	0	0	0	0	0.00115452	0	0	0	0	0	0	0	0	0	0	0	0	0	0	0	0	0	0
D_0__Bacteria;D_1__Firmicutes;D_2__Bacilli;D_3__Bacillales;D_4__Bacillaceae;D_5__Anoxybacillus	0	0	0	0	0	0	0	0	0	0	0	0	0	0	0	0	0	0	0	0.00395693	0	0	0	0	0	0	0	0	0	0	0	0
D_0__Bacteria;D_1__Firmicutes;D_2__Bacilli;D_3__Bacillales;D_4__Bacillaceae;D_5__Bacillus	0	0.00100404	0	0	0	0	0	0	0	0	0	0	0	0	0	0	0	0	0	0	0	0	0	0	0	0	0	0	0	0	0.000771938	0
D_0__Bacteria;D_1__Firmicutes;D_2__Bacilli;D_3__Bacillales;D_4__Planococcaceae;__	0.000836988	0	0	0	0	0	0	0.00679877	0.00416121	0	0	0	0	0.00346357	0	0	0	0	0	0	0	0	0	0	0	0	0	0	0	0	0	0
D_0__Bacteria;D_1__Firmicutes;D_2__Bacilli;D_3__Bacillales;D_4__Planococcaceae;D_5__Psychrobacillus	0	0	0.0195478	0	0	0	0	0	0	0	0	0	0	0	0	0	0	0	0	0	0	0	0	0	0	0	0	0	0	0	0	0
D_0__Bacteria;D_1__Firmicutes;D_2__Bacilli;D_3__Bacillales;D_4__Planococcaceae;D_5__Sporosarcina	0	0.00702825	0	0	0	0	0.00212398	0	0	0.00320599	0.00918717	0.00700481	0.00435756	0	0.00110381	0	0	0	0	0	0	0	0	0.00154055	0	0	0	0	0	0	0	0
D_0__Bacteria;D_1__Firmicutes;D_2__Bacilli;D_3__Bacillales;D_4__Staphylococcaceae;D_5__Jeotgalicoccus	0	0	0	0	0	0	0.0162839	0.0111253	0	0.00641198	0.00275615	0	0	0.0288631	0.00165572	0	0	0	0	0	0	0	0	0	0	0	0	0	0	0	0	0.00113859
D_0__Bacteria;D_1__Firmicutes;D_2__Bacilli;D_3__Bacillales;D_4__Staphylococcaceae;D_5__Staphylococcus	0	0	0	0	0	0	0.0325678	0.0061807	0.00260075	0.0121828	0.0119433	0.0133091	0.00163408	0.00317494	0.00248357	0	0	0	0	0	0	0	0	0	0	0	0	0	0	0	0	0
D_0__Bacteria;D_1__Firmicutes;D_2__Bacilli;D_3__Lactobacillales;D_4__Aerococcaceae;D_5__Facklamia	0	0	0	0	0	0	0	0	0	0.00448839	0.00229679	0.00210144	0.00163408	0	0	0	0	0	0	0	0	0	0	0	0	0	0	0	0	0	0	0
D_0__Bacteria;D_1__Firmicutes;D_2__Bacilli;D_3__Lactobacillales;D_4__Carnobacteriaceae;D_5__Atopostipes	0	0	0	0	0	0	0	0	0.00780226	0	0.00413422	0.00350241	0	0.00750441	0.00413929	0	0	0	0	0	0	0	0	0	0	0	0	0	0	0	0	0
D_0__Bacteria;D_1__Firmicutes;D_2__Bacilli;D_3__Lactobacillales;D_4__Lactobacillaceae;__	0	0	0	0	0	0	0	0	0	0	0	0	0	0	0	0	0	0	0	0.000791387	0	0	0	0	0	0	0	0	0	0	0	0
D_0__Bacteria;D_1__Firmicutes;D_2__Bacilli;D_3__Lactobacillales;D_4__Lactobacillaceae;D_5__Lactobacillus	0.0870468	0.314765	0.0967614	0.288291	0.120079	0.0669443	0.0792954	0.0661335	0.10195	0.173765	0.161694	0.159009	0.10322	0.117761	0.219658	0.824918	0.512051	1.11252	0.39784	2.08333	3.17077	1.26098	2.66648	1.02754	3.23807	2.71608	0.164336	0.0756595	0.0518863	0.082115	0.333477	0.183313
D_0__Bacteria;D_1__Firmicutes;D_2__Bacilli;D_3__Lactobacillales;D_4__Leuconostocaceae;D_5__Leuconostoc	0	0	0	0	0	0	0	0	0	0	0	0	0	0	0	0	0	0	0	0	0.00117024	0	0	0	0	0	0	0	0	0	0	0
D_0__Bacteria;D_1__Firmicutes;D_2__Bacilli;D_3__Lactobacillales;D_4__Streptococcaceae;D_5__Streptococcus	0.00167398	0	0	0	0	0	0	0	0	0	0	0	0	0	0.00275953	0.0137611	0.00359082	0	0.0112748	0	0.00234048	0	0.00204485	0.00359461	0.0053989	0	0	0.00429884	0	0	0	0
D_0__Bacteria;D_1__Firmicutes;D_2__Clostridia;D_3__Clostridiales;__;__	0.0146473	0.0311251	0.1124	0.0398861	0.0331737	0.0475535	0.0729235	0.0648973	0.0223665	0.077585	0.105652	0.0861592	0.0433032	0.04849	0.0190407	0.00325263	0.0215449	0.0965355	0.0438913	0.0411521	0.110003	0.0263231	0.0314907	0.0112973	0.00825714	0.061882	0.0199067	0.0636228	0.17724	0.0795082	0.000771938	0.0815989
D_0__Bacteria;D_1__Firmicutes;D_2__Clostridia;D_3__Clostridiales;D_4__Christensenellaceae;D_5__Christensenellaceae R-7 group	0.0117178	0.0150605	0.0263895	0.00706842	0.0228945	0.0193908	0.0162839	0	0.0223665	0	0.00321551	0.0273188	0.00898747	0.024245	0.0568462	0.0095077	0.0653529	0.00675074	0	0.034821	0.0596823	0.0541649	0	0.16946	0.017467	0.0381157	0.040237	0.0167655	0.040407	0.0643017	0.0328074	0.0368144
D_0__Bacteria;D_1__Firmicutes;D_2__Clostridia;D_3__Clostridiales;D_4__Christensenellaceae;D_5__uncultured	0.00167398	0.00251009	0.00244347	0.00706842	0.00280341	0.00277011	0.00778794	0.00185421	0.0010403	0	0.000918717	0	0.00435756	0.00173179	0.00386334	0	0.0129269	0.0141765	0.0229523	0.00751817	0.0105322	0.0207548	0.00777042	0.0287569	0.00920989	0.0044842	0.00381193	0	0.00596922	0.00130341	0.00347372	0.00303624
D_0__Bacteria;D_1__Firmicutes;D_2__Clostridia;D_3__Clostridiales;D_4__Clostridiaceae 1;__	0	0	0	0	0	0	0	0	0	0	0	0	0	0	0	0	0	0.00135015	0	0	0	0	0	0	0	0	0	0	0	0	0	0
D_0__Bacteria;D_1__Firmicutes;D_2__Clostridia;D_3__Clostridiales;D_4__Clostridiaceae 1;D_5__Candidatus Arthromitus	0.00334795	0.00853431	0.000977388	0.00151466	0	0.00138505	0.00778794	0.00927105	0.00936271	0.00641198	0.00597166	0.0119082	0.00108939	0.0138543	0.00358738	0.188152	0.0265721	0.00135015	0.04671	0.0162234	0.0029256	0.172619	0.0167678	0.0190001	0.109883	0.00403578	0.00169419	0.00816779	0.00367336	0.00260683	0	0.00113859
D_0__Bacteria;D_1__Firmicutes;D_2__Clostridia;D_3__Clostridiales;D_4__Clostridiaceae 1;D_5__Clostridium sensu stricto 1	0.237286	0.0657644	0.124128	0.105017	0.124285	0.359191	0.0346917	0.0290493	0.0364105	0.0371895	0.0362893	0.0896616	0.0574653	0.0435833	0.263535	2.11696	0.176668	0.13569	0.108721	0.0981319	0.256283	0.0890936	0.0384431	0.0688111	0.050178	0.0825094	0.1313	0.599258	0.18826	0.96105	0.473198	0.592066
D_0__Bacteria;D_1__Firmicutes;D_2__Clostridia;D_3__Clostridiales;D_4__Clostridiales vadinBB60 group;__	0.0690515	0.248499	0.0288329	0.0196906	0.233618	0.186521	0.128855	0.206435	0.0957077	0.20326	0.100599	0.224854	0.0808872	0.138254	0.0863732	0	0.0280084	0.110712	0.155834	0.0419435	0.0432989	0.0298666	0.0707517	0.0220812	0.0647868	0.0233179	0.109275	0.265668	0.0555596	0.0716877	0.0845273	0.179518
D_0__Bacteria;D_1__Firmicutes;D_2__Clostridia;D_3__Clostridiales;D_4__Clostridiales vadinBB60 group;D_5__uncultured bacterium	0.174931	0.538163	0.186681	0.905263	0.785422	0.492156	0.349749	0.475296	0.201298	0.641839	0.690415	0.533066	0.343158	0.554749	0.272365	0.00650527	0.286547	0.384117	0.663201	0.206552	0.108247	0.276393	0.143548	0.0482705	0.374747	0.0600883	0.166878	0.913503	0.349429	0.176395	1.45472	0.652032
D_0__Bacteria;D_1__Firmicutes;D_2__Clostridia;D_3__Clostridiales;D_4__Clostridiales vadinBB60 group;D_5__uncultured Clostridia bacterium	0.0108808	0.0512058	0.0131947	0.0540229	0.0401822	0.0489386	0.0219478	0.0216324	0.0327695	0.0577078	0.0215898	0.0266183	0.0171579	0.0522422	0.0383574	0	0	0.0297032	0.0100668	0.0158277	0.0111173	0.00506214	0.0179947	0.00513516	0.00317582	0	0.0283777	0.0816779	0.024336	0.00868942	0.0578954	0.0686949
D_0__Bacteria;D_1__Firmicutes;D_2__Clostridia;D_3__Clostridiales;D_4__Eubacteriaceae;D_5__Anaerofustis	0	0	0	0	0	0	0	0	0	0	0	0	0	0	0	0	0	0	0	0	0	0	0.00163588	0	0	0	0	0	0	0	0	0
D_0__Bacteria;D_1__Firmicutes;D_2__Clostridia;D_3__Clostridiales;D_4__Family XIII;__	0.0104624	0.00953834	0.0195478	0.026759	0.00513959	0.0124655	0.00778794	0	0.00468136	0	0.00459358	0.00770529	0.00354052	0	0.0126938	0	0.0157996	0.00810088	0.00845611	0.0229502	0.0356923	0.0121491	0	0.0626489	0.0107978	0.0192821	0.0245658	0.0137563	0.0684164	0.0238959	0.025088	0.0125245
D_0__Bacteria;D_1__Firmicutes;D_2__Clostridia;D_3__Clostridiales;D_4__Family XIII;D_5__[Eubacterium] brachy group	0	0	0	0	0	0	0	0	0	0	0	0	0	0	0	0.000750608	0	0.00405044	0	0	0	0	0.00204485	0.00205406	0.000952747	0	0	0	0	0	0	0
D_0__Bacteria;D_1__Firmicutes;D_2__Clostridia;D_3__Clostridiales;D_4__Family XIII;D_5__[Eubacterium] nodatum group	0.00292946	0	0.00293216	0	0.00186894	0	0	0.0061807	0.00156045	0	0	0.00210144	0	0.00115452	0.00413929	0	0.00430898	0.0135015	0.04671	0.00830956	0.0216495	0.0106305	0.0490763	0.0097568	0.0254066	0.0161431	0.00254129	0	0	0.00260683	0	0.00341577
D_0__Bacteria;D_1__Firmicutes;D_2__Clostridia;D_3__Clostridiales;D_4__Family XIII;D_5__Anaerovorax	0.00251096	0.00502018	0	0	0.00513959	0.00507853	0	0	0	0	0	0	0.0057193	0.00202042	0.00220762	0	0.00502715	0.00270029	0	0.00553971	0	0.00506214	0.00858836	0.00359461	0.00285824	0	0	0.0025793	0	0	0	0.00265671
D_0__Bacteria;D_1__Firmicutes;D_2__Clostridia;D_3__Clostridiales;D_4__Family XIII;D_5__Family XIII AD3011 group	0	0	0.00293216	0.00252444	0	0.00230842	0	0	0	0	0.00229679	0	0	0.00144316	0.00662286	0.00150122	0.0136451	0.00945103	0.0225496	0.00791387	0.0310114	0.0151864	0.00204485	0.00821625	0.00476373	0.0322863	0.00169419	0	0	0	0.00308775	0.00189765
D_0__Bacteria;D_1__Firmicutes;D_2__Clostridia;D_3__Clostridiales;D_4__Family XIII;D_5__Family XIII UCG-001	0	0.00200807	0	0	0	0	0	0	0	0.00256479	0	0	0	0.00173179	0.00220762	0.00400324	0	0.00270029	0.0132882	0.00791387	0.0105322	0.0146802	0.0114511	0	0.0139736	0.0103137	0	0	0	0	0	0.00113859
D_0__Bacteria;D_1__Firmicutes;D_2__Clostridia;D_3__Clostridiales;D_4__Lachnospiraceae;__	4.8675	9.34356	3.37492	3.64428	7.34353	15.4757	4.871	6.07377	1.77111	5.64447	13.3554	3.47579	3.66498	11.9029	5.05656	0.434352	12.0601	19.1512	21.3626	20.9634	6.25201	12.6027	5.51618	5.70773	9.33946	6.20121	6.4214	8.6153	7.32377	6.1482	3.99748	4.80864
D_0__Bacteria;D_1__Firmicutes;D_2__Clostridia;D_3__Clostridiales;D_4__Lachnospiraceae;D_5__[Eubacterium] xylanophilum group	0.0410124	0.0612462	0.0791684	0.104512	0.031772	0.0988005	0.0375237	0	0.0244471	0.0327011	0.0321551	0.0392269	0.0269624	0.0643647	0.0631932	0.227184	0.293011	0.287581	0.450993	0.278964	0.295486	0.267787	0.13905	0.064703	0.187691	0.0408063	0.0550612	0.0365401	0.0785182	0.13121	0.117721	0.0948824
D_0__Bacteria;D_1__Firmicutes;D_2__Clostridia;D_3__Clostridiales;D_4__Lachnospiraceae;D_5__A2	0.00627741	0.0165666	0.00977388	0.00100977	0.0182222	0.0554022	0.00991193	0.0061807	0.00520151	0.00512959	0.0160775	0.00420289	0.00408521	0.0124111	0.00193167	0	0	0.054681	0.155029	0.185184	0.0222346	0.0688451	0.00368073	0.014892	0.0311231	0.00358736	0.00423548	0.0150459	0.0261727	0.03693	0.0108071	0.00417483
D_0__Bacteria;D_1__Firmicutes;D_2__Clostridia;D_3__Clostridiales;D_4__Lachnospiraceae;D_5__Acetatifactor	0.035572	0.0712866	0.0141721	0.0186808	0.152786	0.230381	0	0	0	0.00961797	0.0592572	0.0336231	0.117926	0.0479128	0.0286991	0.00175142	0.428744	0.286231	0.0628169	0.178062	0.110588	0.210079	0.00695248	0.0600813	0.0311231	0.0578462	0.0563318	0.0881262	0.14969	0.044316	0.0324214	0.089569
D_0__Bacteria;D_1__Firmicutes;D_2__Clostridia;D_3__Clostridiales;D_4__Lachnospiraceae;D_5__Anaerostipes	0	0	0	0	0	0	0	0	0	0	0	0	0	0	0	0.000750608	0	0	0	0	0	0	0	0	0	0	0	0	0	0	0	0
D_0__Bacteria;D_1__Firmicutes;D_2__Clostridia;D_3__Clostridiales;D_4__Lachnospiraceae;D_5__ASF356	0.0108808	0.0406635	0.00781911	0.0201955	0.007943	0.0373965	0.0148679	0	0.0145642	0.0115416	0.0202118	0.0133091	0.00326817	0.00894756	0.00800263	0	0.0567349	0.112737	0	0.0526272	0.0491501	0.0263231	0.0425328	0.0436488	0.0254066	0.0183852	0	0.0262229	0.00183668	0.00651706	0.0208423	0
D_0__Bacteria;D_1__Firmicutes;D_2__Clostridia;D_3__Clostridiales;D_4__Lachnospiraceae;D_5__Blautia	0.0744919	0.148095	0.0131947	0.0393812	0.0724214	0.185136	0.0785874	0.572333	0.00364105	0.705959	0.146076	0.00490337	0.032954	0.323267	0.0921682	0	0.0208268	0.0243026	0.404283	0.0431306	0.0550013	0.0617581	0.15091	0.0138649	0.107025	0.092823	0.0152477	0.0821078	0.384785	0.0234614	0.0810535	0.124865
D_0__Bacteria;D_1__Firmicutes;D_2__Clostridia;D_3__Clostridiales;D_4__Lachnospiraceae;D_5__Dorea	0.00544042	0.0100404	0.00244347	0	0	0	0	0	0.00416121	0.00641198	0.00734973	0	0.00299582	0.0115452	0.00634691	0	0.00430898	0.036454	0.0475153	0.00751817	0.00936193	0.00658078	0.0740235	0.0128379	0.00158791	0.0228694	0	0	0	0	0	0.0136631
D_0__Bacteria;D_1__Firmicutes;D_2__Clostridia;D_3__Clostridiales;D_4__Lachnospiraceae;D_5__GCA-900066575	0.032224	0.0476917	0.0185704	0.0297884	0.077561	0.0572489	0.0545156	0.0525359	0.0260075	0.00448839	0.0491513	0.020314	0.101858	0.150377	0.102378	0	0.158714	0.18362	0.111943	0.402024	0.12112	0.231846	0.0302637	0.126838	0.102579	0.100895	0.0304954	0.0760894	0.163006	0.0408403	0.0274038	0.155607
D_0__Bacteria;D_1__Firmicutes;D_2__Clostridia;D_3__Clostridiales;D_4__Lachnospiraceae;D_5__Lachnoclostridium	0.00753289	0.0366473	0.00586433	0.0207004	0.00607406	0.0129272	0.0226558	0.0914743	0.0338098	0.00961797	0.0303176	0	0.0057193	0.0265541	0.0322865	0.0200162	0.122806	0.174169	0.266166	0.157882	0.0860127	0.110861	0.0458046	0.0246488	0.153075	0.03408	0	0.0154758	0.0472946	0.00521365	0.00424566	0.0204946
D_0__Bacteria;D_1__Firmicutes;D_2__Clostridia;D_3__Clostridiales;D_4__Lachnospiraceae;D_5__Lachnospiraceae FCS020 group	0	0.0165666	0.00684172	0	0	0.00738696	0	0.00988912	0	0.0121828	0.00321551	0	0.0051746	0.00981346	0	0.00125101	0.0129269	0.064132	0.0906012	0.0352167	0.0210643	0.0192361	0.0159498	0.0210541	0.0371571	0.00986525	0.00254129	0.00773791	0.00229585	0	0	0.00759059
D_0__Bacteria;D_1__Firmicutes;D_2__Clostridia;D_3__Clostridiales;D_4__Lachnospiraceae;D_5__Lachnospiraceae NK4A136 group	5.65595	3.89817	2.22991	3.21967	2.93097	12.4022	1.72609	0.275041	1.13913	0.462304	1.76072	2.3249	6.23022	11.1397	4.36474	0.249702	14.5744	7.69854	1.02762	12.1161	6.26079	18.2196	3.69708	6.98535	4.68434	5.25773	3.15035	10.7411	0.784263	4.68838	2.36175	9.56035
D_0__Bacteria;D_1__Firmicutes;D_2__Clostridia;D_3__Clostridiales;D_4__Lachnospiraceae;D_5__Lachnospiraceae UCG-001	0.102113	0.0155626	0.215514	0.0363519	0.0570027	0.0373965	0	0	0.0504546	0.12824	0.218195	0.017512	0.0275071	0.302485	0.277332	0.00225182	0.00861797	0.0884346	0	0.0902181	0.306603	0.385735	0.0196305	0.178703	0.104167	0	0.00635321	0.0133264	0.00367336	0.0799426	0.0204564	0.21785
D_0__Bacteria;D_1__Firmicutes;D_2__Clostridia;D_3__Clostridiales;D_4__Lachnospiraceae;D_5__Lachnospiraceae UCG-006	0.00585892	0.0160646	0.00342086	0	0	0.0092337	0.0134519	0.00556263	0	0	0.00734973	0	0	0.00288631	0.00413929	0	0	0.0249777	0.0620115	0.0185976	0	0.00303728	0.00858836	0.00308109	0.00317582	0.00313894	0	0.00558849	0.0307644	0	0.0108071	0.00417483
D_0__Bacteria;D_1__Firmicutes;D_2__Clostridia;D_3__Clostridiales;D_4__Lachnospiraceae;D_5__Lachnospiraceae UCG-010	0	0	0	0	0	0	0	0	0	0	0	0	0	0.000865893	0	0.00125101	0.00502715	0	0	0	0.00409584	0.00303728	0	0	0	0	0	0	0	0	0	0
D_0__Bacteria;D_1__Firmicutes;D_2__Clostridia;D_3__Clostridiales;D_4__Lachnospiraceae;D_5__Marvinbryantia	0	0	0	0	0	0	0	0	0	0	0	0	0	0	0	0	0	0	0.00362405	0	0	0	0	0	0.00412857	0	0	0	0	0	0	0
D_0__Bacteria;D_1__Firmicutes;D_2__Clostridia;D_3__Clostridiales;D_4__Lachnospiraceae;D_5__Roseburia	0.0200877	0.0672704	0.035186	0.0217102	0.0144843	0.112189	0.00707995	0	0.017165	0.00256479	0.0969246	0	0.00299582	0.0360789	0.0184888	0	0.0294447	0.0283531	0.00161069	0.125435	0.0228197	0.0430282	0	0.00410813	0.0416033	0.0103137	0.00762386	0.0915652	0.00367336	0.0199857	0.012737	0.0519956
D_0__Bacteria;D_1__Firmicutes;D_2__Clostridia;D_3__Clostridiales;D_4__Lachnospiraceae;D_5__Tyzzerella	0.0376645	0.0712866	0.0141721	0.0040391	0.152786	0.0286245	0.0382317	0.0537721	0.048374	0.15517	0.0431797	0.0259178	0.0961387	0.0277086	0.0314586	0.00150122	0.101979	0.0452299	0.113554	0.0162234	0.0509055	0.042522	0.040897	0.016946	0.00825714	0.0282505	0.0254129	0.0722205	0.0399478	0.0278061	0.0142809	0.0861532
D_0__Bacteria;D_1__Firmicutes;D_2__Clostridia;D_3__Clostridiales;D_4__Lachnospiraceae;D_5__Tyzzerella 3	0.037246	0.028615	0.0151495	0.0100977	0.0121481	0.0549405	0.00212398	0	0.0109232	0	0.0137807	0.00280192	0.00599164	0.0170292	0.00662286	0.000500405	0.0287266	0.108687	0	0.0664765	0.0286709	0.0177175	0	0.0236217	0.0101626	0.00896841	0.00211774	0.00816779	0.00229585	0.0125997	0.012351	0.0113859
D_0__Bacteria;D_1__Firmicutes;D_2__Clostridia;D_3__Clostridiales;D_4__Lachnospiraceae;D_5__uncultured	0.0221802	0.00803229	0	0.00858308	0.0252307	0.0341647	0.144431	2.58909	0.0218463	0.0378307	0.113002	0.0196135	0.0117109	0.0401197	0.0413929	0.00550446	0.0646347	0.0398293	1.95054	0.107233	0.0409584	0.045053	0.0286279	0.0256758	0.0470022	0.0260084	0.0127064	0.0206344	0.0417845	0.0186822	0.037439	0.0178379
D_0__Bacteria;D_1__Firmicutes;D_2__Clostridia;D_3__Clostridiales;D_4__Peptococcaceae;D_5__Peptococcus	0.00585892	0.0210848	0.00195478	0.00555376	0.0102792	0.0212375	0.0120359	0	0.00468136	0.00448839	0.0055123	0.00840577	0.0122556	0.0152974	0.00634691	0.00125101	0.0100543	0.0155267	0.0632195	0.0178062	0.014628	0.0313853	0.0229023	0.0133514	0.0171494	0.0112105	0.00592967	0.011177	0.00688756	0.00695153	0.00154388	0.00569295
D_0__Bacteria;D_1__Firmicutes;D_2__Clostridia;D_3__Clostridiales;D_4__Peptococcaceae;D_5__uncultured	0.0949982	0.0642583	0.0513129	0.112085	0.0981194	0.13158	0.0948713	0.0395565	0.0421322	0.0654022	0.180068	0.0798549	0.105671	0.113432	0.0706439	0	0.108443	0.147166	0.187243	0.128205	0.152131	0.157939	0.156226	0.0831895	0.121634	0.0825094	0.066497	0.1122	0.0863241	0.051702	0.0428426	0.0595862
D_0__Bacteria;D_1__Firmicutes;D_2__Clostridia;D_3__Clostridiales;D_4__Peptostreptococcaceae;D_5__Romboutsia	0	0.0100404	0.0908971	0.0171662	0.031772	0.00507853	0.0120359	0.00432649	0.00676196	0.00256479	0.00643102	0.0623428	0.0743509	0.135657	0.0251117	0.0255207	0.0078998	0.0209273	0.0918092	0.0482746	0.0409584	0.0637829	0	0.0246488	0.00381099	0.0322863	0.0444725	0.00343907	0.0142343	0.00521365	0.00656148	0.0269466
D_0__Bacteria;D_1__Firmicutes;D_2__Clostridia;D_3__Clostridiales;D_4__Ruminococcaceae;__	1.29984	2.49804	1.63273	1.25818	3.75564	3.20686	1.88114	1.53343	1.08711	1.46193	1.4998	1.54596	3.12328	3.61193	3.36221	0.0708074	2.26365	1.84363	2.66851	2.5914	2.20532	2.65914	1.4772	2.70315	1.3583	1.37441	2.93264	3.35094	4.43926	3.39452	2.06146	2.29578
D_0__Bacteria;D_1__Firmicutes;D_2__Clostridia;D_3__Clostridiales;D_4__Ruminococcaceae;D_5__[Eubacterium] coprostanoligenes group	0.0184137	0.0185747	0.0635302	0.0302932	0.0228945	0.0166207	0.0346917	0.00123614	0.118594	0.0403955	0.0390455	0.0231159	0.0302306	0.0395425	0.125558	0.0955774	0.122088	0.0168768	0.00161069	0.294396	0.108832	0.378648	0.333719	1.26222	0.0295352	0.354252	0.030919	0.0193448	0.106068	0.0738601	0.062141	0.0201151
D_0__Bacteria;D_1__Firmicutes;D_2__Clostridia;D_3__Clostridiales;D_4__Ruminococcaceae;D_5__Anaerotruncus	0.0443604	0.0416675	0.030299	0.0691696	0.0439201	0.207758	0.0446037	0.0673696	0.0280881	0.0256479	0.0698225	0.0266183	0.0315923	0.134213	0.0284231	0.00450365	0.0933613	0.0708827	0.0398645	0.05421	0.0216495	0.0602394	0.026583	0.0503245	0.0473198	0.0654694	0.022448	0.117358	0.0408662	0.0308474	0.126212	0.114238
D_0__Bacteria;D_1__Firmicutes;D_2__Clostridia;D_3__Clostridiales;D_4__Ruminococcaceae;D_5__Butyricicoccus	0.0414309	0.114962	0.0645076	0.0429154	0.0289686	0.123732	0.160007	0.043883	0.0332896	0.0948973	0.0886561	0.0952654	0.05801	0.0912074	0.111761	0.0132607	0.083307	0.0999109	0.0853665	0.0767645	0.0380328	0.0222734	0.184036	0	0.0724088	0.0421515	0.0216009	0.055455	0.096885	0.0338887	0.0358951	0.0550318
D_0__Bacteria;D_1__Firmicutes;D_2__Clostridia;D_3__Clostridiales;D_4__Ruminococcaceae;D_5__Candidatus Soleaferrea	0	0.00401614	0	0	0	0	0	0.00494456	0	0	0.00734973	0	0	0.0118339	0.00275953	0	0	0.00472552	0.0153015	0.00712248	0.00526608	0.00607457	0	0.00205406	0	0	0	0.0025793	0.00688756	0	0.00694745	0.00607247
D_0__Bacteria;D_1__Firmicutes;D_2__Clostridia;D_3__Clostridiales;D_4__Ruminococcaceae;D_5__Ethanoligenens	0	0	0	0	0	0	0	0	0	0	0	0	0	0	0	0	0	0	0	0	0	0	0	0	0	0	0	0	0	0	0	0.00265671
D_0__Bacteria;D_1__Firmicutes;D_2__Clostridia;D_3__Clostridiales;D_4__Ruminococcaceae;D_5__Faecalibacterium	0	0	0	0	0	0	0	0	0	0	0	0	0	0	0	0.00150122	0	0	0	0	0	0	0	0	0	0	0	0	0	0	0	0
D_0__Bacteria;D_1__Firmicutes;D_2__Clostridia;D_3__Clostridiales;D_4__Ruminococcaceae;D_5__GCA-900066225	0	0	0	0	0	0	0	0	0	0	0	0	0	0	0	0	0.00574531	0	0.0120802	0	0	0	0	0.00410813	0.00158791	0	0	0	0.00183668	0	0	0
D_0__Bacteria;D_1__Firmicutes;D_2__Clostridia;D_3__Clostridiales;D_4__Ruminococcaceae;D_5__Harryflintia	0.00292946	0.0100404	0	0.00353421	0.015886	0.0189291	0	0.00741684	0	0.00192359	0.00321551	0	0.00354052	0.0193383	0.00441524	0	0.0143633	0.0155267	0.045502	0.0170148	0.0058512	0.0121491	0.0106332	0	0.00666923	0.00269052	0	0.0141862	0.0078059	0	0	0.00607247
D_0__Bacteria;D_1__Firmicutes;D_2__Clostridia;D_3__Clostridiales;D_4__Ruminococcaceae;D_5__Hydrogenoanaerobacterium	0	0.00200807	0	0	0	0	0	0	0	0.00192359	0.00183743	0	0.00326817	0.00317494	0	0	0	0.00337537	0.00563741	0	0	0	0	0	0	0	0	0.00300919	0	0.00173788	0	0
D_0__Bacteria;D_1__Firmicutes;D_2__Clostridia;D_3__Clostridiales;D_4__Ruminococcaceae;D_5__Intestinimonas	0.0962536	0.0627523	0.0254121	0.0893651	0.0752249	0.110804	0.114695	0.0519179	0.0327695	0.285333	0.108868	0.0329226	0.0558312	0.0903415	0.0157293	0	0.0631984	0.143116	0.204557	0.128205	0.0456394	0.0688451	0.094063	0.0508381	0.111154	0.0475326	0.0419312	0.0455677	0.0624472	0.0534399	0.0420706	0.0288443
D_0__Bacteria;D_1__Firmicutes;D_2__Clostridia;D_3__Clostridiales;D_4__Ruminococcaceae;D_5__Negativibacillus	0	0	0	0	0	0	0	0	0	0	0	0	0.000544695	0	0	0	0	0	0	0	0	0	0	0	0	0	0	0	0	0	0	0
D_0__Bacteria;D_1__Firmicutes;D_2__Clostridia;D_3__Clostridiales;D_4__Ruminococcaceae;D_5__Oscillibacter	0.471643	2.04623	0.509708	2.33662	1.8068	3.32782	0.946589	0.983967	0.340179	1.33049	1.02161	0.284395	1.26751	2.19071	1.07042	0.0262713	0.303783	1.41158	2.03309	1.21122	0.26974	0.80893	1.06087	0.210541	0.562121	0.126455	0.460396	1.98993	1.01614	0.649534	2.45206	0.956415
D_0__Bacteria;D_1__Firmicutes;D_2__Clostridia;D_3__Clostridiales;D_4__Ruminococcaceae;D_5__Ruminiclostridium	0.622719	1.71991	0.288818	0.358975	0.710665	2.04942	0.420549	0.550082	0.376589	0.564896	1.38497	0.15971	0.718725	1.14904	0.532589	0.0375304	0.714573	0.96738	1.74357	0.758544	0.308944	0.979017	0.361529	0.128379	0.566884	0.0820609	0.327402	1.68471	0.363663	0.424478	1.16408	0.680117
D_0__Bacteria;D_1__Firmicutes;D_2__Clostridia;D_3__Clostridiales;D_4__Ruminococcaceae;D_5__Ruminiclostridium 5	0.0272021	0.0858451	0.0259008	0.0292835	0.0471907	0.0794098	0.0127439	0.0735503	0.0249672	0.0474487	0.0413422	0.0182125	0.0465714	0.0652306	0.0866491	0.0112591	0.192468	0.27813	1.3268	0.260366	0.105907	0.20451	0.155817	0.310164	0.196266	0.0520168	0.030919	0.0485769	0.0371928	0.09037	0.0393689	0.0413687
D_0__Bacteria;D_1__Firmicutes;D_2__Clostridia;D_3__Clostridiales;D_4__Ruminococcaceae;D_5__Ruminiclostridium 6	0.072818	0.103918	0.052779	0.062606	0.149048	0.688372	0.0828354	0.0284312	0.0218463	0.00448839	0.131836	0.168816	0.0721721	0.192517	0.356531	0.0122599	0.781362	0.671698	0.211	0.574942	0.190749	0.571515	0.00327176	0.0775409	0.516706	0.125558	0.341379	0.0653423	0.275962	0.0842874	0.227336	0.163957
D_0__Bacteria;D_1__Firmicutes;D_2__Clostridia;D_3__Clostridiales;D_4__Ruminococcaceae;D_5__Ruminiclostridium 9	0.908551	1.37603	0.333289	0.565979	1.25546	2.06235	1.18802	0.84552	0.425483	1.96463	1.27793	0.556182	1.11499	1.60768	0.826202	0.0225182	0.783517	1.1213	1.65418	1.04107	0.31772	0.731479	1.01302	0.35638	0.418891	0.205377	0.493856	1.99466	0.937626	0.572633	1.13977	0.796253
D_0__Bacteria;D_1__Firmicutes;D_2__Clostridia;D_3__Clostridiales;D_4__Ruminococcaceae;D_5__Ruminococcaceae NK4A214 group	0.0933242	0.103416	0.122662	0.199935	0.0677491	0.092337	0.0269038	0	0.107671	0.00512959	0.14332	0.0329226	0.125825	0.290363	0.113141	0.00300243	0.116343	0.0681824	0.0652329	0.0985276	0.144525	0.12301	0.027401	0.145325	0.0981329	0.0399094	0.0893685	0.104032	0.0821915	0.199857	0.120036	0.138149
D_0__Bacteria;D_1__Firmicutes;D_2__Clostridia;D_3__Clostridiales;D_4__Ruminococcaceae;D_5__Ruminococcaceae UCG-004	0.0912317	0.15914	0.105558	0.0287786	0.103259	0.0387815	0.156467	0.231158	0.0572166	0	0.0362893	0.020314	0.0190643	0.0623443	0.12611	0	0.0459625	0.0891097	0.124023	0.0724119	0.0602674	0.0865626	0	0.128892	0.0892406	0.0762315	0.139347	0.0662021	0.351265	0.194209	0.135089	0.0804603
D_0__Bacteria;D_1__Firmicutes;D_2__Clostridia;D_3__Clostridiales;D_4__Ruminococcaceae;D_5__Ruminococcaceae UCG-005	0.0422679	0.0406635	0.0259008	0.040391	0.0724214	0.147739	0.00283198	0.00370842	0.0150844	0.0115416	0.048692	0.0434298	0.0721721	0.0360789	0.0529829	0.000750608	0.100543	0.168768	0.0181202	0.178062	0.0936193	0.119466	0.0143139	0.048784	0.0368395	0.01704	0.035578	0.0885561	0.00596922	0.0577846	0.0849132	0.0686949
D_0__Bacteria;D_1__Firmicutes;D_2__Clostridia;D_3__Clostridiales;D_4__Ruminococcaceae;D_5__Ruminococcaceae UCG-009	0.0585892	0.153116	0.030299	0.0252444	0.18082	0.167592	0.0913313	0.199019	0.0639785	0.0570666	0.105193	0.055338	0.17049	0.212144	0.12611	0.00350284	0.111315	0.238976	0.17033	0.176084	0.126386	0.235896	0.06748	0.0672706	0.160061	0.0461873	0.088945	0.108331	0.0757631	0.029544	0.0544217	0.095262
D_0__Bacteria;D_1__Firmicutes;D_2__Clostridia;D_3__Clostridiales;D_4__Ruminococcaceae;D_5__Ruminococcaceae UCG-010	0.0112993	0.00803229	0.012706	0.0348372	0.015886	0.0138505	0.0191159	0.00370842	0.0114433	0.00320599	0.00689037	0.0154106	0.0152515	0.00952483	0.0317346	0.00250203	0.0387808	0.045905	0.0302004	0.0344253	0.128726	0.0916247	0.0760683	0.0749733	0.0244538	0.0443936	0.0385428	0.00687814	0.0321419	0.029544	0.0312635	0.0318805
D_0__Bacteria;D_1__Firmicutes;D_2__Clostridia;D_3__Clostridiales;D_4__Ruminococcaceae;D_5__Ruminococcaceae UCG-013	0.00209247	0.0230928	0.0107513	0	0.00186894	0.0092337	0.00849594	0.00185421	0	0	0.0110246	0	0	0.00115452	0.0104862	0.150872	0.365545	0.0256528	0.00201336	0.120686	0.224101	0.118454	0	0.821625	0.0111154	0.160983	0	0.00300919	0.00459171	0.181174	0.012737	0.0102473
D_0__Bacteria;D_1__Firmicutes;D_2__Clostridia;D_3__Clostridiales;D_4__Ruminococcaceae;D_5__Ruminococcaceae UCG-014	0.286668	0.258037	0.481364	1.51416	0.292022	0.638048	0.141599	0.0154517	0.215342	0.0423191	0.172259	0.227656	0.126097	0.256016	0.862628	0.421341	2.9811	0.940378	0.0386565	2.38286	3.05199	2.87428	0.147229	14.0621	1.89819	3.12415	0.450655	0.290601	2.27978	1.52108	0.74878	0.496425
D_0__Bacteria;D_1__Firmicutes;D_2__Clostridia;D_3__Clostridiales;D_4__Ruminococcaceae;D_5__Ruminococcus 1	0.0866283	0.185747	0.168111	0.250424	0.0233618	0.210067	0.0148679	0.00185421	0.0218463	0.0557842	0.0110246	0.0616423	0.0280518	0.0253995	0.0678844	0.0202664	0.392836	0.773634	0.00523474	0.0557928	0.125801	0.188312	0.013087	0.276785	0.192137	0.0964104	0.11944	0.22096	0.0142343	1.61667	0.342741	0.0482003
D_0__Bacteria;D_1__Firmicutes;D_2__Clostridia;D_3__Clostridiales;D_4__Ruminococcaceae;D_5__UBA1819	0.0531487	0.0672704	0.0288329	0.00757331	0.156991	0.0572489	0.0906233	0.0135975	0.00520151	0	0.0344519	0.0273188	0.0939599	0.138543	0.205861	0.00175142	0.00861797	0.0492804	0.200531	0.0977362	0.0234048	0.0288542	0.00204485	0.015919	0.0133385	0.0251115	0.0313425	0.03697	0.462844	0.03693	0.012351	0.150673
D_0__Bacteria;D_1__Firmicutes;D_2__Clostridia;D_3__Clostridiales;D_4__Ruminococcaceae;D_5__uncultured	0.310523	0.702323	0.165179	0.192867	0.597594	1.07203	0.280366	0.233012	0.197657	0.418702	0.333494	0.137294	0.317557	0.559078	0.251393	0.0127603	0.357646	0.307158	2.17443	0.306267	0.141014	0.20856	0.342307	0.0621354	0.167048	0.030941	0.144853	0.654283	0.38203	0.231573	0.431128	0.318425
D_0__Bacteria;D_1__Firmicutes;D_2__Erysipelotrichia;D_3__Erysipelotrichales;D_4__Erysipelotrichaceae;__	0	0	0	0	0	0	0	0	0	0	0.00780909	0.00280192	0	0.00288631	0.000827858	0	0	0.0175519	0	0.00276985	0	0.0106305	0	0	0.00730439	0.00179368	0	0	0	0.000868942	0.00270178	0.00910871
D_0__Bacteria;D_1__Firmicutes;D_2__Erysipelotrichia;D_3__Erysipelotrichales;D_4__Erysipelotrichaceae;D_5__Allobaculum	0.0493823	0.0577321	0.0659737	0.00706842	0.00560682	0.0101571	0.00495596	0.0309035	0.189855	0.0102592	0.00964652	0.0413284	0.0468438	0.0115452	0.00855453	0.626007	0.0459625	0.497529	0.0173149	0.0732033	0.21708	0.0501152	0.00817939	0.0528921	0.0111154	0.178471	0.0978395	0.0180551	0.10515	0.0395369	0.050176	0.0470617
D_0__Bacteria;D_1__Firmicutes;D_2__Erysipelotrichia;D_3__Erysipelotrichales;D_4__Erysipelotrichaceae;D_5__Dubosiella	0.0640296	0.0702825	0.035186	0.213567	0.0827006	0.00184674	0.0148679	0.00123614	0.163847	0.00256479	0.00643102	0.018913	0.0182473	0.00692715	0.0314586	0.374053	0.0244176	0.126239	0.0157042	0.0391736	0.115269	0.0207548	0.0310817	0.0200271	0.00508132	0.177574	0.0232951	0.00558849	0.034897	0.164664	0.0829834	0.0307419
D_0__Bacteria;D_1__Firmicutes;D_2__Erysipelotrichia;D_3__Erysipelotrichales;D_4__Erysipelotrichaceae;D_5__Erysipelatoclostridium	0	0	0.00488694	0	0	0	0.00283198	0	0.00624181	0	0.00826845	0.00770529	0.000817042	0	0.000551905	0.00150122	0.0186723	0	0	0	0	0.00658078	0	0.0688111	0.0142912	0.0206273	0	0	0	0	0	0.00113859
D_0__Bacteria;D_1__Firmicutes;D_2__Erysipelotrichia;D_3__Erysipelotrichales;D_4__Erysipelotrichaceae;D_5__Faecalibaculum	0	0	0	0	0	0	0	0	0.0140441	0	0	0	0	0	0	0.00100081	0	0	0	0	0	0	0	0	0	0	0	0	0	0	0.00231582	0
D_0__Bacteria;D_1__Firmicutes;D_2__Erysipelotrichia;D_3__Erysipelotrichales;D_4__Erysipelotrichaceae;D_5__Turicibacter	2.87715	2.09693	6.19127	3.33327	2.87023	0.269624	2.62595	0.088384	1.42261	0.083997	4.23896	3.81342	2.24442	0.451708	0.948725	11.1873	1.94335	3.06281	1.43754	0.919195	2.48501	0.86765	2.00804	1.36955	5.76031	1.37351	4.39176	0.364541	1.66174	3.33717	1.96651	2.40432
D_0__Bacteria;D_1__Firmicutes;D_2__Erysipelotrichia;D_3__Erysipelotrichales;D_4__Erysipelotrichaceae;D_5__uncultured	0.000836988	0	0	0.00201955	0.00140171	0.00230842	0.00424797	0	0.00468136	0	0.00826845	0.138695	0.0155238	0.02742	0.00386334	0.00150122	0.00718164	0.0148516	0.00966413	0.00989233	0.00994705	0.0161988	0.103469	0.00359461	0.00349341	0.00672631	0	0	0	0	0	0.00493389
D_0__Bacteria;D_1__Firmicutes;D_2__Erysipelotrichia;D_3__Erysipelotrichales;D_4__Erysipelotrichaceae;D_5__uncultured bacterium	0	0	0.00244347	0	0	0.00184674	0	0.00370842	0	0	0.00505294	0	0	0.00115452	0	0.0107587	0.0114906	0.00405044	0.00805344	0.00633109	0.0128726	0.0111367	0.013496	0.00359461	0.0130209	0.00941683	0	0.00343907	0	0	0	0
D_0__Bacteria;D_1__Fusobacteria;D_2__Fusobacteriia;D_3__Fusobacteriales;D_4__Fusobacteriaceae;D_5__Fusobacterium	0	0	0	0	0	0	0	0	0	0	0	0	0	0	0	0.00250203	0	0	0	0	0	0	0	0	0	0	0	0	0	0	0	0
D_0__Bacteria;D_1__Nitrospirae;D_2__Nitrospira;D_3__Nitrospirales;D_4__Nitrospiraceae;D_5__Nitrospira	0	0	0	0	0	0.00230842	0	0	0	0	0	0	0	0	0	0	0	0	0	0	0	0	0	0	0	0	0	0	0	0	0	0
D_0__Bacteria;D_1__Patescibacteria;D_2__Saccharimonadia;D_3__Saccharimonadales;D_4__Saccharimonadaceae;D_5__Candidatus Saccharimonas	0.0104624	0.00853431	0.0156382	0.0040391	0.0144843	0.0604807	0.0113279	0.00494456	0.126397	0	0.0151588	0.00700481	0.0182473	0.057149	0.0187648	0.29649	0.0143633	0.128939	0.0197309	0.0391736	0.0567567	0.0263231	0.0102242	0.110919	0.23247	0.0439452	0.0436254	0.00730802	0.0890791	0.0729911	0.0362811	0.0110064
D_0__Bacteria;D_1__Proteobacteria;D_2__Alphaproteobacteria;D_3__NRL2;__;__	0	0	0	0	0	0	0	0	0	0	0	0	0	0	0	0	0	0	0	0	0	0	0	0	0	0.00313894	0	0	0	0	0	0
D_0__Bacteria;D_1__Proteobacteria;D_2__Alphaproteobacteria;D_3__Rhizobiales;D_4__Rhizobiaceae;D_5__Allorhizobium-Neorhizobium-Pararhizobium-Rhizobium	0	0	0	0	0	0	0	0	0	0	0	0	0	0	0	0	0	0	0	0	0	0	0	0	0	0	0	0	0.000918341	0	0	0
D_0__Bacteria;D_1__Proteobacteria;D_2__Alphaproteobacteria;D_3__Rhizobiales;D_4__Rhizobiaceae;D_5__Ochrobactrum	0	0.00150605	0	0	0	0	0	0	0	0	0	0	0	0	0	0	0	0	0	0	0	0	0	0	0	0	0	0	0	0	0	0
D_0__Bacteria;D_1__Proteobacteria;D_2__Alphaproteobacteria;D_3__Rhizobiales;D_4__Xanthobacteraceae;D_5__Bradyrhizobium	0	0	0	0	0	0	0	0	0	0	0	0	0	0	0	0	0	0.00202522	0	0	0	0	0.00449866	0.00821625	0	0	0	0	0	0	0	0
D_0__Bacteria;D_1__Proteobacteria;D_2__Alphaproteobacteria;D_3__Rhodospirillales;D_4__uncultured;D_5__Azospirillum sp. 47_25	0.515166	0.414165	1.30628	2.66833	0.625161	0.12604	0.123899	0.695947	0.0332896	0.336629	0.0124027	0.90292	0.54987	0.0828371	0.940171	0.515167	0.247048	0.0803338	0.126842	0.078743	0.0713847	0.355362	0.130461	1.51898	0.151169	0.0762315	1.00762	0.73854	1.1493	3.3337	3.68292	0.286545
D_0__Bacteria;D_1__Proteobacteria;D_2__Alphaproteobacteria;D_3__Rickettsiales;D_4__Mitochondria;__	0.00292946	0.00251009	0	0	0	0.00138505	0	0	0	0	0.00367487	0	0.00190643	0.00144316	0.00193167	0.00750608	0	0	0	0.00237416	0	0	0	0	0.00476373	0	0	0.00171954	0	0	0	0.00189765
D_0__Bacteria;D_1__Proteobacteria;D_2__Alphaproteobacteria;D_3__SAR11 clade;D_4__Clade I;D_5__Clade Ia	0.00167398	0	0	0	0	0	0	0	0	0	0	0	0	0	0	0	0	0	0	0	0	0	0	0	0	0	0	0	0	0	0	0
D_0__Bacteria;D_1__Proteobacteria;D_2__Alphaproteobacteria;D_3__Sphingomonadales;D_4__Sphingomonadaceae;D_5__Novosphingobium	0	0	0	0	0	0	0	0	0	0	0	0	0	0	0	0	0	0	0	0	0	0	0	0	0	0	0	0	0.00183668	0	0	0
D_0__Bacteria;D_1__Proteobacteria;D_2__Deltaproteobacteria;D_3__Desulfarculales;D_4__Desulfarculaceae;D_5__uncultured	0	0	0	0	0	0	0	0	0	0	0	0.00140096	0	0	0	0	0	0	0	0	0	0	0	0	0	0	0	0	0	0	0	0
D_0__Bacteria;D_1__Proteobacteria;D_2__Deltaproteobacteria;D_3__Desulfovibrionales;D_4__Desulfovibrionaceae;D_5__Bilophila	0.237286	0.344384	0.103114	0.297379	0.739633	0.778401	0.160715	0.17615	0.170609	0.182742	0.491054	0.124686	0.234491	0.444203	0.251945	0.0337774	0.229812	0.643345	0.429651	0.304288	0.103566	0.238933	0.413877	0.121703	0.269945	0.200892	0.292248	0.566587	0.214892	0.349749	0.45583	0.349167
D_0__Bacteria;D_1__Proteobacteria;D_2__Deltaproteobacteria;D_3__Desulfovibrionales;D_4__Desulfovibrionaceae;D_5__Desulfovibrio	0	0	0	0	0	0	0	0	0	0	0	0	0.000544695	0	0	0	0	0	0	0	0	0	0	0	0	0	0	0	0	0	0	0
D_0__Bacteria;D_1__Proteobacteria;D_2__Gammaproteobacteria;D_3__Betaproteobacteriales;__;__	0	0	0	0	0	0	0	0	0	0	0	0	0	0	0	0	0	0	0	0	0	0	0	0	0	0	0	0	0	0.00173788	0	0
D_0__Bacteria;D_1__Proteobacteria;D_2__Gammaproteobacteria;D_3__Betaproteobacteriales;D_4__Burkholderiaceae;__	0	0	0	0	0	0	0	0	0	0.00192359	0.00229679	0	0	0	0.000827858	0.000750608	0	0	0	0	0	0	0	0	0	0	0	0.00128965	0	0	0	0
D_0__Bacteria;D_1__Proteobacteria;D_2__Gammaproteobacteria;D_3__Betaproteobacteriales;D_4__Burkholderiaceae;D_5__Burkholderia-Caballeronia-Paraburkholderia	0.00167398	0	0	0.00151466	0	0	0	0	0.0020806	0	0.00229679	0	0	0	0	0	0	0	0.000805344	0	0	0	0	0	0.000635165	0	0	0	0	0	0	0.000759059
D_0__Bacteria;D_1__Proteobacteria;D_2__Gammaproteobacteria;D_3__Betaproteobacteriales;D_4__Burkholderiaceae;D_5__Parasutterella	4.15732	0.489468	3.42917	1.343	0.959701	0.196216	1.08819	2.89689	5.15209	1.32023	0.37254	2.4741	2.78475	0.510877	1.83591	6.80451	0.700928	1.08417	0.345895	0.210509	2.30069	0.463692	1.62279	1.56057	1.19252	3.36405	2.40448	0.267388	1.14655	1.70486	1.183	0.932884
D_0__Bacteria;D_1__Proteobacteria;D_2__Gammaproteobacteria;D_3__Cellvibrionales;D_4__Cellvibrionaceae;__	0	0	0	0	0	0	0	0	0	0	0	0	0	0	0	0	0	0	0	0	0	0	0	0	0	0	0.00169419	0	0	0	0	0
D_0__Bacteria;D_1__Proteobacteria;D_2__Gammaproteobacteria;D_3__Enterobacteriales;D_4__Enterobacteriaceae;__	0	0	0	0	0	0	0	0	0	0	0	0	0	0	0	0	0	0	0	0	0	0.00404971	0.00163588	0	0.00317582	0	0	0	0	0	0	0
D_0__Bacteria;D_1__Proteobacteria;D_2__Gammaproteobacteria;D_3__Enterobacteriales;D_4__Enterobacteriaceae;D_5__Escherichia-Shigella	0	0.00200807	0.00244347	0	0	0.00507853	0.0198239	0	0	0	0.00321551	0.00840577	0.00326817	0	0	0	0.00646347	0	0	0	0	0	0	0	0	0	0	0.00128965	0	0	0.00115791	0
D_0__Bacteria;D_1__Proteobacteria;D_2__Gammaproteobacteria;D_3__Enterobacteriales;D_4__Enterobacteriaceae;D_5__Proteus	0	0	0	0	0	0	0	0	0	0	0	0	0	0.00144316	0.00165572	0	0	0	0	0	0	0	0	0	0	0	0	0	0	0	0	0
D_0__Bacteria;D_1__Proteobacteria;D_2__Gammaproteobacteria;D_3__KI89A clade;__;__	0	0	0	0	0	0	0	0	0	0	0	0	0	0	0.000827858	0	0	0	0	0	0	0	0	0	0	0	0	0	0	0	0	0
D_0__Bacteria;D_1__Proteobacteria;D_2__Gammaproteobacteria;D_3__Pseudomonadales;D_4__Moraxellaceae;D_5__Acinetobacter	0	0	0	0	0	0	0	0	0	0	0	0	0	0	0.00110381	0	0	0	0	0	0	0	0	0	0	0	0	0.00128965	0	0	0	0
D_0__Bacteria;D_1__Proteobacteria;D_2__Gammaproteobacteria;D_3__Pseudomonadales;D_4__Moraxellaceae;D_5__Enhydrobacter	0	0	0	0	0	0	0	0	0	0	0	0	0.000544695	0	0	0	0	0	0	0	0	0	0	0	0	0	0.000847095	0	0	0	0	0
D_0__Bacteria;D_1__Proteobacteria;D_2__Gammaproteobacteria;D_3__Pseudomonadales;D_4__Moraxellaceae;D_5__Psychrobacter	0	0	0	0	0	0	0	0	0	0	0.00734973	0	0	0	0	0	0	0	0	0	0	0	0	0	0	0	0	0	0	0	0	0
D_0__Bacteria;D_1__Proteobacteria;D_2__Gammaproteobacteria;D_3__Xanthomonadales;D_4__Rhodanobacteraceae;D_5__Rhodanobacter	0	0	0	0	0	0	0	0	0	0	0	0	0	0	0	0	0	0	0	0	0	0	0	0	0	0	0	0.00214942	0	0	0	0
D_0__Bacteria;D_1__Proteobacteria;D_2__Gammaproteobacteria;D_3__Xanthomonadales;D_4__Xanthomonadaceae;D_5__Xanthomonas	0	0	0	0	0	0	0	0	0	0	0	0	0	0	0	0	0	0	0	0	0	0	0	0	0	0	0	0	0	0	0.00347372	0
D_0__Bacteria;D_1__Spirochaetes;D_2__Spirochaetia;D_3__Spirochaetales;D_4__Spirochaetaceae;D_5__Salinispira	0	0	0	0	0	0	0	0	0	0	0	0	0	0	0	0	0	0	0	0	0	0	0	0	0	0	0.00296483	0	0	0	0	0
D_0__Bacteria;D_1__Tenericutes;D_2__Mollicutes;D_3__Mollicutes RF39;__;__	0.0732365	0.0943794	0.370919	0.765914	0.100456	0.115883	0.0325678	0.00185421	0.0853047	0.00192359	0.0859	0.117681	0.111118	0.15817	0.206137	0.0507911	0.47327	0.601491	0.0100668	0.486703	0.775285	0.580121	0.0094063	2.3175	0.395072	0.605816	0.23041	0.216232	0.630441	0.348446	0.609059	0.249731
D_0__Bacteria;D_1__Tenericutes;D_2__Mollicutes;D_3__Mollicutes RF39;D_4__uncultured bacterium;D_5__uncultured bacterium	0.185811	0	0.0166156	0.0141368	0	0.00230842	0.00566396	0	0	0	0.000918717	0.00910626	0.000817042	0.0129884	1.6066	0.00525426	0.00430898	0.00810088	0	0	0.902256	0.059227	0.00613454	0.0374866	0.0177846	0.0273536	0.00592967	0	0	0.0395369	0.062913	0.000759059
D_0__Bacteria;D_1__Tenericutes;D_2__Mollicutes;D_3__Mollicutes RF39;D_4__uncultured Lachnospiraceae bacterium;D_5__uncultured Lachnospiraceae bacterium	0.0138103	0	0.00342086	0.0297884	0.00700853	0.0120038	0.00778794	0.00185421	0.0228866	0	0.00137807	0.0168115	0.00381286	0.0349244	0.00579501	0.0175142	0.0265721	0.340912	0.00201336	0.0672679	0.722039	0.0106305	0	0.00616219	0.00158791	0.00582947	0.022448	0.0159057	0.00459171	0	0.025088	0.00872918
D_0__Bacteria;D_1__Tenericutes;D_2__Mollicutes;D_3__Mollicutes RF39;D_4__unidentified;D_5__unidentified	0	0	0.0107513	0.0368568	0.00887747	0.00738696	0	0	0.00780226	0	0.00734973	0.00980674	0.00626399	0.0129884	0.0256636	0.00650527	0.0301629	0.0330786	0	0.0553971	0.0807466	0.0526462	0.00572557	0.0760003	0.0546242	0.03408	0.022448	0.0206344	0.0174485	0.00955836	0.0358951	0.0102473
D_0__Bacteria;D_1__Verrucomicrobia;D_2__Verrucomicrobiae;D_3__Verrucomicrobiales;D_4__Akkermansiaceae;D_5__Akkermansia	1.21656	0.0391574	0.305434	4.70504	1.2877	0.420595	0.0113279	0.0123614	0.58673	0.00961797	0.012862	0.0140096	0.0130727	0.0314608	3.93564	0.0235191	0.0143633	1.30087	6.66503	0.752213	0.0550013	0.106305	0.0143139	1.72233	0.0158791	0.408959	0.363404	0.0150459	6.14003	1.14049	0.539199	0.0504774

## Sheet: Sheet 3 Fold change
	Phylum changes	Fold change		Pattern
CFA vs. naïve in feces		CFA/Naïve	P-value
	D_0__Bacteria;D_1__Bacteroidetes	1.2128	0.00535522	Upregulated
	D_0__Bacteria;D_1__Proteobacteria	1.89023	0.0375397	Upregulated
	D_0__Bacteria;D_1__Firmicutes	0.662556	0.00389844	Downregulated
CFA vs. naïve in ileum		CFA/Naïve	P-value
	D_0__Bacteria;D_1__Cyanobacteria	0.53882	0.0978297	Downregulated
Feces vs. ileum in naïve		Ileum/Feces	P value
	D_0__Bacteria;D_1__Bacteroidetes	1.26566	0.00579307	Upregulated
	D_0__Bacteria;D_1__Firmicutes	0.59887	0.00623804	Downregulated
Feces vs. ileum in CFA		Ileum/Feces	P value
	D_0__Bacteria;D_1__Cyanobacteria	0.427599	0.0247923	Downregulated
	Genus changes	Fold change		Pattern
CFA vs. naïve in feces		CFA/Naïve	P-value
	D_0__Bacteria;D_1__Firmicutes;D_2__Clostridia;D_3__Clostridiales;D_4__Clostridiaceae 1;D_5__Clostridium sensu stricto 1	3.167	0.0412073	Upregulated
	D_0__Bacteria;D_1__Bacteroidetes;D_2__Bacteroidia;D_3__Bacteroidales;D_4__Rikenellaceae;D_5__Alistipes	1.40701	0.00740267	Upregulated
	D_0__Bacteria;D_1__Firmicutes;D_2__Clostridia;D_3__Clostridiales;D_4__Peptococcaceae;D_5__uncultured	0.556244	0.00110579	Downregulated
	D_0__Bacteria;D_1__Firmicutes;D_2__Clostridia;D_3__Clostridiales;D_4__Christensenellaceae;D_5__uncultured	0.249534	0.00117835	Downregulated
	D_0__Bacteria;D_1__Firmicutes;D_2__Clostridia;D_3__Clostridiales;D_4__Lachnospiraceae;D_5__[Eubacterium] xylanophilum group	0.357354	0.00218674	Downregulated
	D_0__Bacteria;D_1__Actinobacteria;D_2__Coriobacteriia;D_3__Coriobacteriales;D_4__Eggerthellaceae;D_5__Gordonibacter	0.361474	0.00308277	Downregulated
	D_0__Bacteria;D_1__Firmicutes;D_2__Clostridia;D_3__Clostridiales;D_4__Lachnospiraceae;D_5__ASF356	0.258527	0.0101449	Downregulated
	D_0__Bacteria;D_1__Firmicutes;D_2__Clostridia;D_3__Clostridiales;D_4__Ruminococcaceae;D_5__Ruminococcaceae UCG-010	0.459183	0.0150499	Downregulated
	D_0__Bacteria;D_1__Firmicutes;D_2__Clostridia;D_3__Clostridiales;D_4__Lachnospiraceae;D_5__Lachnoclostridium	0.283178	0.0164873	Downregulated
	D_0__Bacteria;D_1__Firmicutes;D_2__Clostridia;D_3__Clostridiales;D_4__Lachnospiraceae;__	0.51011	0.02356	Downregulated
	D_0__Bacteria;D_1__Firmicutes;D_2__Clostridia;D_3__Clostridiales;D_4__Lachnospiraceae;D_5__Lachnospiraceae FCS020 group	0.239802	0.0266295	Downregulated
	D_0__Bacteria;D_1__Bacteroidetes;D_2__Bacteroidia;D_3__Bacteroidales;D_4__Rikenellaceae;D_5__Rikenella	0.700345	0.0269507	Downregulated
	D_0__Bacteria;D_1__Firmicutes;D_2__Erysipelotrichia;D_3__Erysipelotrichales;D_4__Erysipelotrichaceae;D_5__uncultured bacterium	0.36433	0.0273346	Downregulated
	D_0__Bacteria;D_1__Firmicutes;D_2__Clostridia;D_3__Clostridiales;D_4__Family XIII;D_5__Anaerovorax	0.265279	0.0276964	Downregulated
	D_0__Bacteria;D_1__Firmicutes;D_2__Clostridia;D_3__Clostridiales;D_4__Peptococcaceae;D_5__Peptococcus	0.352312	0.0303144	Downregulated
	D_0__Bacteria;D_1__Firmicutes;D_2__Clostridia;D_3__Clostridiales;D_4__Ruminococcaceae;D_5__Ruminococcaceae UCG-009	0.551642	0.0315539	Downregulated
CFA vs. naïve in ileum		CFA/Naïve	P-value
	D_0__Bacteria;D_1__Firmicutes;D_2__Clostridia;D_3__Clostridiales;D_4__Ruminococcaceae;D_5__[Eubacterium] coprostanoligenes group	2.48266	0.0332759	Upregulated
	D_0__Bacteria;D_1__Firmicutes;D_2__Bacilli;D_3__Lactobacillales;D_4__Carnobacteriaceae;D_5__Atopostipes	1.00339	0.00982868	Upregulated
	D_0__Bacteria;D_1__Firmicutes;D_2__Bacilli;D_3__Lactobacillales;D_4__Aerococcaceae;D_5__Facklamia	1.00132	0.0389759	Upregulated
	D_0__Bacteria;D_1__Proteobacteria;D_2__Gammaproteobacteria;D_3__Betaproteobacteriales;D_4__Burkholderiaceae;__	1.00072	0.0442102	Upregulated
	D_0__Bacteria;D_1__Firmicutes;D_2__Clostridia;D_3__Clostridiales;D_4__Ruminococcaceae;D_5__Ruminococcaceae UCG-004	0.351431	0.0186058	Downregulated
	D_0__Bacteria;D_1__Firmicutes;D_2__Clostridia;D_3__Clostridiales;D_4__Ruminococcaceae;D_5__Ruminococcus 1	0.310182	0.0382711	Downregulated
	D_0__Bacteria;D_1__Firmicutes;D_2__Clostridia;D_3__Clostridiales;D_4__Family XIII;__	0.362207	0.046563	Downregulated
Feces vs. ileum in naïve		Ileum/Feces	P value
	D_0__Bacteria;D_1__Firmicutes;D_2__Clostridia;D_3__Clostridiales;D_4__Clostridiales vadinBB60 group;D_5__uncultured Clostridia bacterium	2.76065	0.0106736	Upregulated
	D_0__Bacteria;D_1__Actinobacteria;D_2__Coriobacteriia;D_3__Coriobacteriales;D_4__Eggerthellaceae;D_5__Gordonibacter	0.0352325	2.60981e-06	Downregulated
	D_0__Bacteria;D_1__Firmicutes;D_2__Erysipelotrichia;D_3__Erysipelotrichales;D_4__Erysipelotrichaceae;D_5__uncultured bacterium	0.112616	0.000107842	Downregulated
	D_0__Bacteria;D_1__Firmicutes;D_2__Clostridia;D_3__Clostridiales;D_4__Lachnospiraceae;D_5__[Eubacterium] xylanophilum group	0.218541	0.000304895	Downregulated
	D_0__Bacteria;D_1__Firmicutes;D_2__Clostridia;D_3__Clostridiales;D_4__Christensenellaceae;D_5__uncultured	0.230577	0.000841389	Downregulated
	D_0__Bacteria;D_1__Firmicutes;D_2__Clostridia;D_3__Clostridiales;D_4__Ruminococcaceae;D_5__Ruminococcaceae UCG-010	0.229373	0.00131117	Downregulated
	D_0__Bacteria;D_1__Firmicutes;D_2__Bacilli;D_3__Lactobacillales;D_4__Lactobacillaceae;D_5__Lactobacillus	0.0915109	0.00166791	Downregulated
	D_0__Bacteria;D_1__Firmicutes;D_2__Clostridia;D_3__Clostridiales;D_4__Family XIII;D_5__Family XIII AD3011 group	0.0705792	0.00169434	Downregulated
	D_0__Bacteria;D_1__Firmicutes;D_2__Clostridia;D_3__Clostridiales;D_4__Family XIII;D_5__Family XIII UCG-001	0.0331552	0.00374608	Downregulated
	D_0__Bacteria;D_1__Firmicutes;D_2__Clostridia;D_3__Clostridiales;D_4__Peptococcaceae;D_5__uncultured	0.612901	0.00434757	Downregulated
	D_0__Bacteria;D_1__Firmicutes;D_2__Clostridia;D_3__Clostridiales;D_4__Lachnospiraceae;D_5__Lachnoclostridium	0.20628	0.00451839	Downregulated
	D_0__Bacteria;D_1__Firmicutes;D_2__Clostridia;D_3__Clostridiales;D_4__Lachnospiraceae;D_5__GCA-900066575	0.27089	0.00710226	Downregulated
	D_0__Bacteria;D_1__Firmicutes;D_2__Clostridia;D_3__Clostridiales;D_4__Family XIII;D_5__[Eubacterium] nodatum group	0.0848542	0.0098615	Downregulated
	D_0__Bacteria;D_1__Firmicutes;D_2__Clostridia;D_3__Clostridiales;D_4__Lachnospiraceae;D_5__Lachnospiraceae FCS020 group	0.145207	0.0101599	Downregulated
	D_0__Bacteria;D_1__Tenericutes;D_2__Mollicutes;D_3__Mollicutes RF39;D_4__unidentified;D_5__unidentified	0.191374	0.0106426	Downregulated
	D_0__Bacteria;D_1__Firmicutes;D_2__Clostridia;D_3__Clostridiales;D_4__Lachnospiraceae;D_5__Dorea	0.0902528	0.0259083	Downregulated
	D_0__Bacteria;D_1__Firmicutes;D_2__Clostridia;D_3__Clostridiales;D_4__Lachnospiraceae;D_5__ASF356	0.364208	0.0274102	Downregulated
	D_0__Bacteria;D_1__Firmicutes;D_2__Clostridia;D_3__Clostridiales;D_4__Ruminococcaceae;D_5__Ruminiclostridium 5	0.134476	0.0476609	Downregulated
Feces vs. ileum in CFA		Ileum/Feces	P value
	D_0__Bacteria;D_1__Bacteroidetes;D_2__Bacteroidia;D_3__Bacteroidales;D_4__Muribaculaceae;D_5__uncultured Bacteroidales bacterium	1.57919	0.0204731	Upregulated
	D_0__Bacteria;D_1__Firmicutes;D_2__Bacilli;D_3__Bacillales;D_4__Staphylococcaceae;D_5__Staphylococcus	1.00592	0.00904976	Upregulated
	D_0__Bacteria;D_1__Firmicutes;D_2__Bacilli;D_3__Lactobacillales;D_4__Carnobacteriaceae;D_5__Atopostipes	1.00339	0.00982868	Upregulated
	D_0__Bacteria;D_1__Actinobacteria;D_2__Actinobacteria;D_3__Corynebacteriales;D_4__Corynebacteriaceae;D_5__Corynebacterium 1	1.00651	0.0100835	Upregulated
	D_0__Bacteria;D_1__Firmicutes;D_2__Bacilli;D_3__Bacillales;D_4__Planococcaceae;D_5__Sporosarcina	1.00311	0.0256019	Upregulated
	D_0__Bacteria;D_1__Firmicutes;D_2__Bacilli;D_3__Lactobacillales;D_4__Aerococcaceae;D_5__Facklamia	1.00132	0.0389759	Upregulated
	D_0__Bacteria;D_1__Firmicutes;D_2__Clostridia;D_3__Clostridiales;D_4__Ruminococcaceae;D_5__Ruminococcaceae UCG-010	0.401354	0.0035664	Downregulated
	D_0__Bacteria;D_1__Firmicutes;D_2__Clostridia;D_3__Clostridiales;D_4__Family XIII;__	0.167474	0.00841032	Downregulated
	D_0__Bacteria;D_1__Firmicutes;D_2__Clostridia;D_3__Clostridiales;D_4__Ruminococcaceae;D_5__Ruminococcaceae UCG-014	0.214961	0.0131464	Downregulated
	D_0__Bacteria;D_1__Firmicutes;D_2__Clostridia;D_3__Clostridiales;D_4__Ruminococcaceae;D_5__Ruminococcaceae UCG-004	0.283857	0.0153228	Downregulated

## Sheet: Sheet 4 Pattern Matching
Mice number	Group	anti-Mtb-Ab levels	Absorbance at 2^7 dilutions	Serum IgA (ng/mL)	IgG1(ng/mL)	IgG2c (ng/mL)	IgG2c/ IgG1 (Th1/Th2)	Feces PC1	Ileum PC1	Feces PC2	Ileum PC2	Facklamia from ileum	Atopostipes from ileum
290	Naïve 1	7	0.058	117000	182923	157300	0.859925	-1.91458	-9.14659	0.0962632	-13.8017	0	0
291	Naïve 2	7	0.055	34040	126407	150000	1.18665	-2.56542	8.75487	0.515503	-17.4491	0	0
292	Naïve 3	7	0.053	59470	150749	264300	1.75324	-10.6391	-8.63005	-6.5108	-12.7906	0	0
293	Naïve 4	7	0.05	21740	164867	34280	0.207925	-10.8125	3.24252	-1.2313	-12.5577	0	0
294	Naïve 5	7	0.05	80910	260893	86730	0.332435	15.1943	4.37059	2.72942	-15.6699	0	0
295	Naïve 6	7	0.051	25770	152207	244600	1.60702	-1.70717	15.3346	5.31322	-4.28874	0	0
296	Naïve 7	7	0.047	10490	82090.8	23870	0.290775	15.2066	-0.353768	-2.18857	-18.1295	0	0
297	Naïve 8	7	0.058	26700	111571	59510	0.533384	1.31871	-12.1663	-6.39516	-11.6586	0	0
298	CFA 1	8	0.07	497700	650178	392300	0.603374	5.30666	-13.1197	-6.23891	-24.1558	0	0.00780226
299	CFA 2	11	0.276	339400	326017	1480000	4.53965	15.8544	9.7824	0.627057	-19.6713	0.00448839	0
300	CFA 3	11	0.225	133700	940108	401200	0.42676	10.6997	8.80551	-8.95898	-16.7187	0.00229679	0.00413422
301	CFA 4	13	0.298	193800	401704	1083000	2.69601	-1.59556	-2.96184	-11.0733	-20.0751	0.00210144	0.00350241
302	CFA 5	8	0.086	200300	646281	673400	1.04196	1.68109	-2.05706	-17.2704	-18.3448	0.00163408	0
303	CFA 6	9	0.09	568900	957389	1500000	1.56676	5.41674	11.9457	-11.5156	-10.5391	0	0.00750441
305	CFA 7	11	0.184	185700	383659	160400	0.41808	9.23013	-7.8079	-13.2952	-13.9683	0	0.00413929
306	CFA 8	9	0.089	108700	210883	87300	0.413974	5.77451	-28.9882	-9.91842	-7.82271	0	0

## Sheet: Sheet 5 PCA raw data
Group	Naïve 1	Naïve 2	Naïve 3	Naïve 4	Naïve 5	Naïve 6	Naïve 7	Naïve 8	CFA 1	CFA 2	CFA 3	CFA 4	CFA 5	CFA 6	CFA 7	CFA 8
Mice number	290	291	292	293	294	295	296	297	298	299	300	301	302	303	305	306
Anti-PPD	0.058	0.055	0.053	0.05	0.05	0.051	0.047	0.058	0.07	0.276	0.225	0.298	0.086	0.09	0.184	0.089
IgA	117	34.04	59.47	21.74	80.91	25.77	10.49	26.7	497.7	339.4	133.7	193.8	200.3	568.9	185.7	108.7
IgG1	182.923	126.407	150.749	164.867	260.893	152.207	82.0908	111.571	650.178	326.017	940.108	401.704	646.281	957.389	383.659	210.883
IgG2c	157.3	150	264.3	34.28	86.73	244.6	23.87	59.51	392.3	1480	401.2	1083	673.4	1500	160.4	87.3
Feces PC1	-1.91458	-2.56542	-10.6391	-10.8125	15.1943	-1.70717	15.2066	1.31871	5.30666	15.8544	10.6997	-1.59556	1.68109	5.41674	9.23013	5.77451
Ileum PC1	-9.14659	8.75487	-8.63005	3.24252	4.37059	15.3346	-0.353768	-12.1663	-13.1197	9.7824	8.80551	-2.96184	-2.05706	11.9457	-7.8079	-28.9882
Feces PC2	0.0962632	0.515503	-6.5108	-1.2313	2.72942	5.31322	-2.18857	-6.39516	-6.23891	0.627057	-8.95898	-11.0733	-17.2704	-11.5156	-13.2952	-9.91842
Ileum PC2	-13.8017	-17.4491	-12.7906	-12.5577	-15.6699	-4.28874	-18.1295	-11.6586	-24.1558	-19.6713	-16.7187	-20.0751	-18.3448	-10.5391	-13.9683	-7.82271
